# Supplementary material for: Fear extinction is regulated by the activity of long noncoding RNAs at the synapse
Source: PubMed Central journal article supplement (PMC10665438; doi:10.1038/s41467-023-43535-1), 2023-11-22
Supplement: 41467_2023_43535_MOESM1_ESM.pdf [file 41467_2023_43535_MOESM1_ESM.pdf]

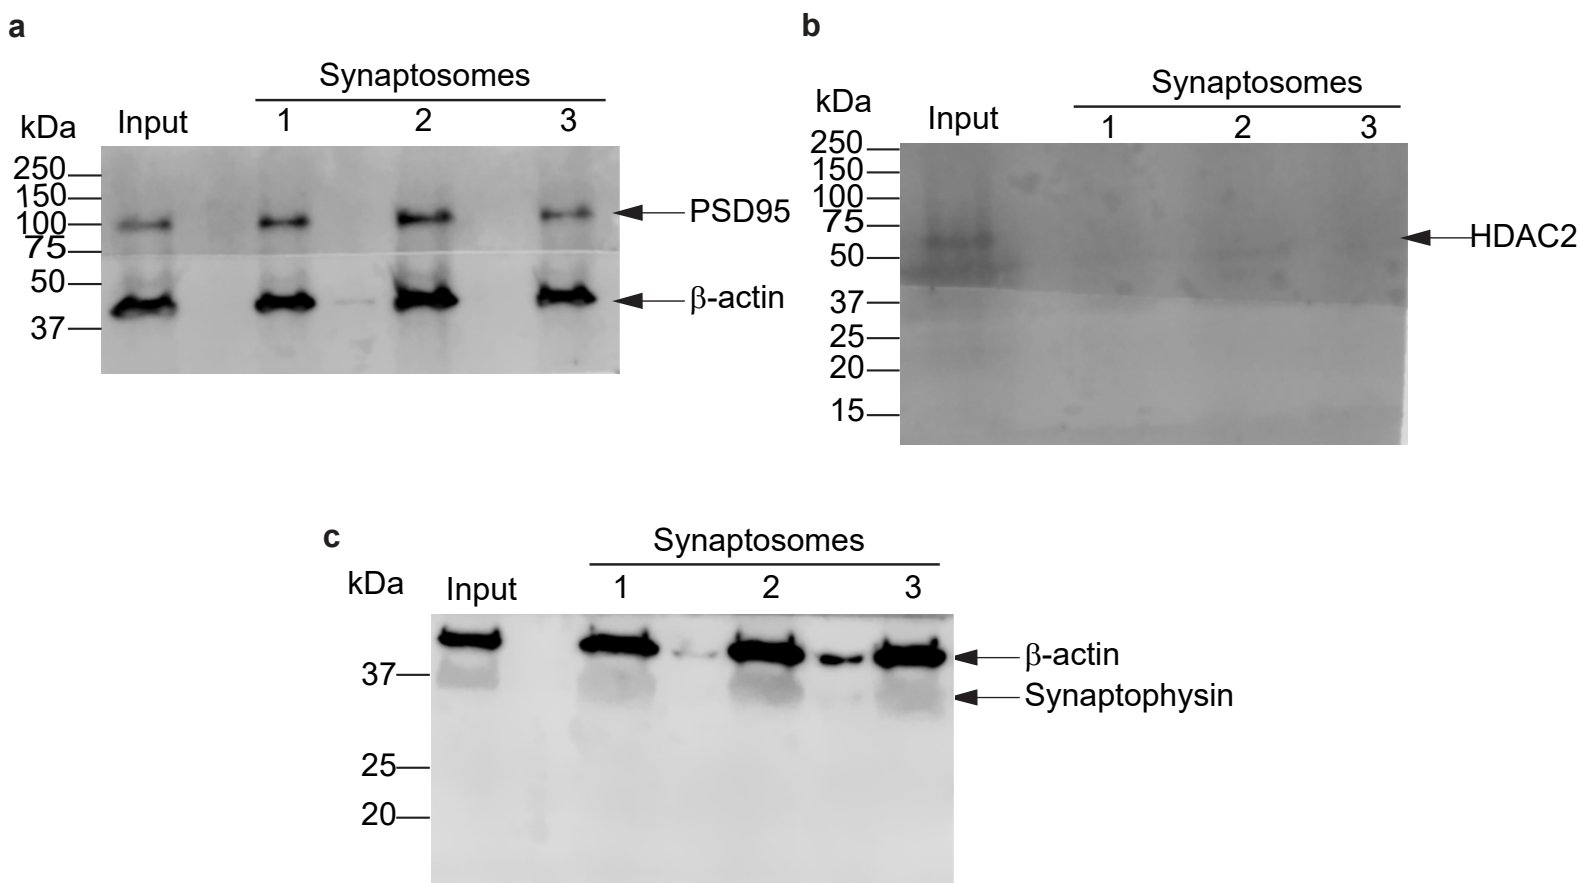

Supplementary Figure 1. Blot displaying a) PSD95 b) HDAC2 and c) synaptophysin proteins from synaptosomes of mouse prefrontal cortex (PFC). Each lane represents separate synaptosome protein lysates of four PFCs.  $\beta$ -actin is used as the internal loading control. 50  $\mu$ g of protein lysates were loaded onto each lane. The molecular marker and 10% input are indicated.

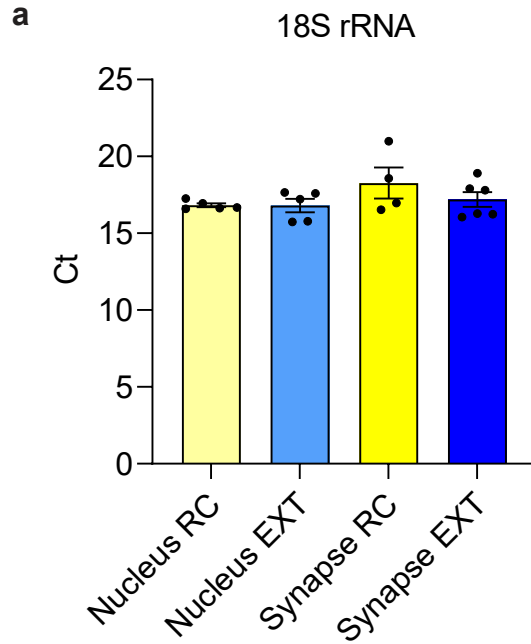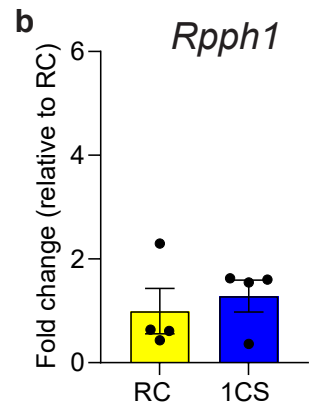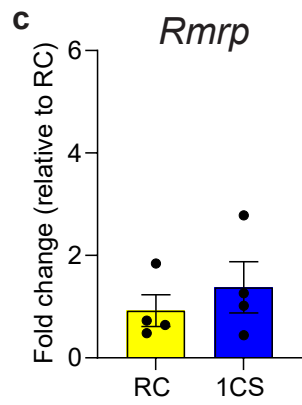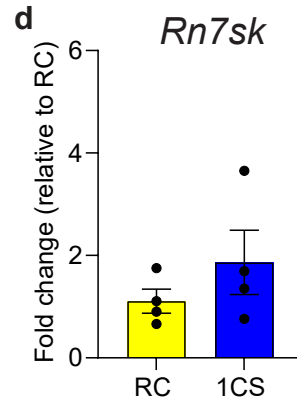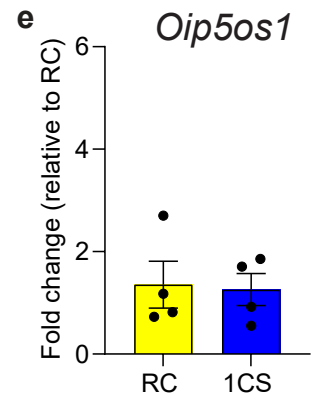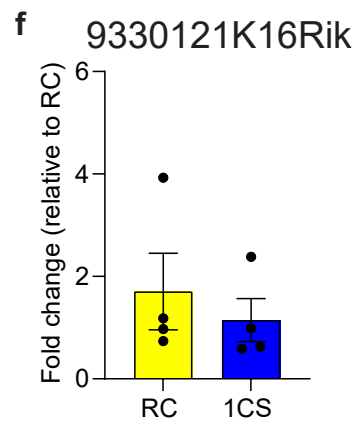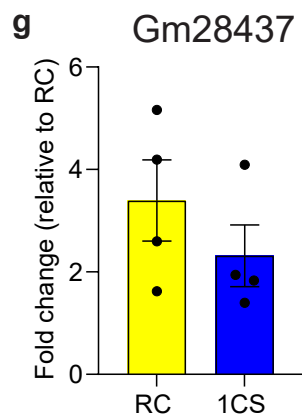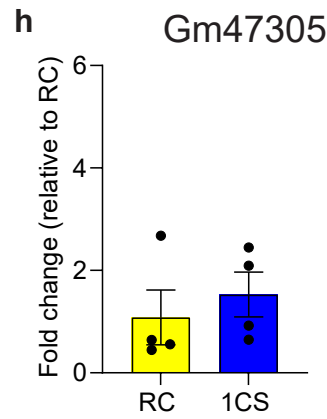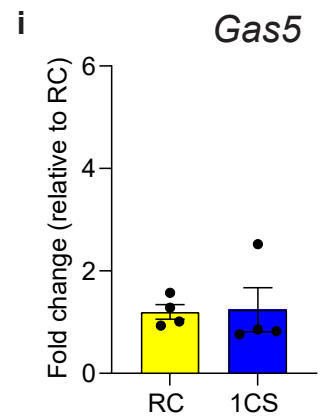

Supplementary Figure 2. (a) Graph showing RT-qPCR Ct values of housekeeping gene 18S rRNA in the nucleus and synapse in the ILPFC following 60CS fear extinction training (EXT) (nucleus EXT, n = 5 independent biological replicates per group; synapse EXT, n = 6 independent biological replicates per group). Retention control (RC) is also indicated (nucleus RC, n = 5 independent biological replicates per group; synapse RC, n = 4 independent biological replicates per group). Statistical significance was determined using a two-tailed unpaired Student's t-test. (b-i) RT-qPCR of 8 of the 10 candidates in the synapse in the ILPFC following a short 1CS fear extinction training. 18S rRNA was used as the housekeeping gene for normalization. n = 4 biological replicates per group. Statistical significance was determined using a two-tailed unpaired Student's t-test.

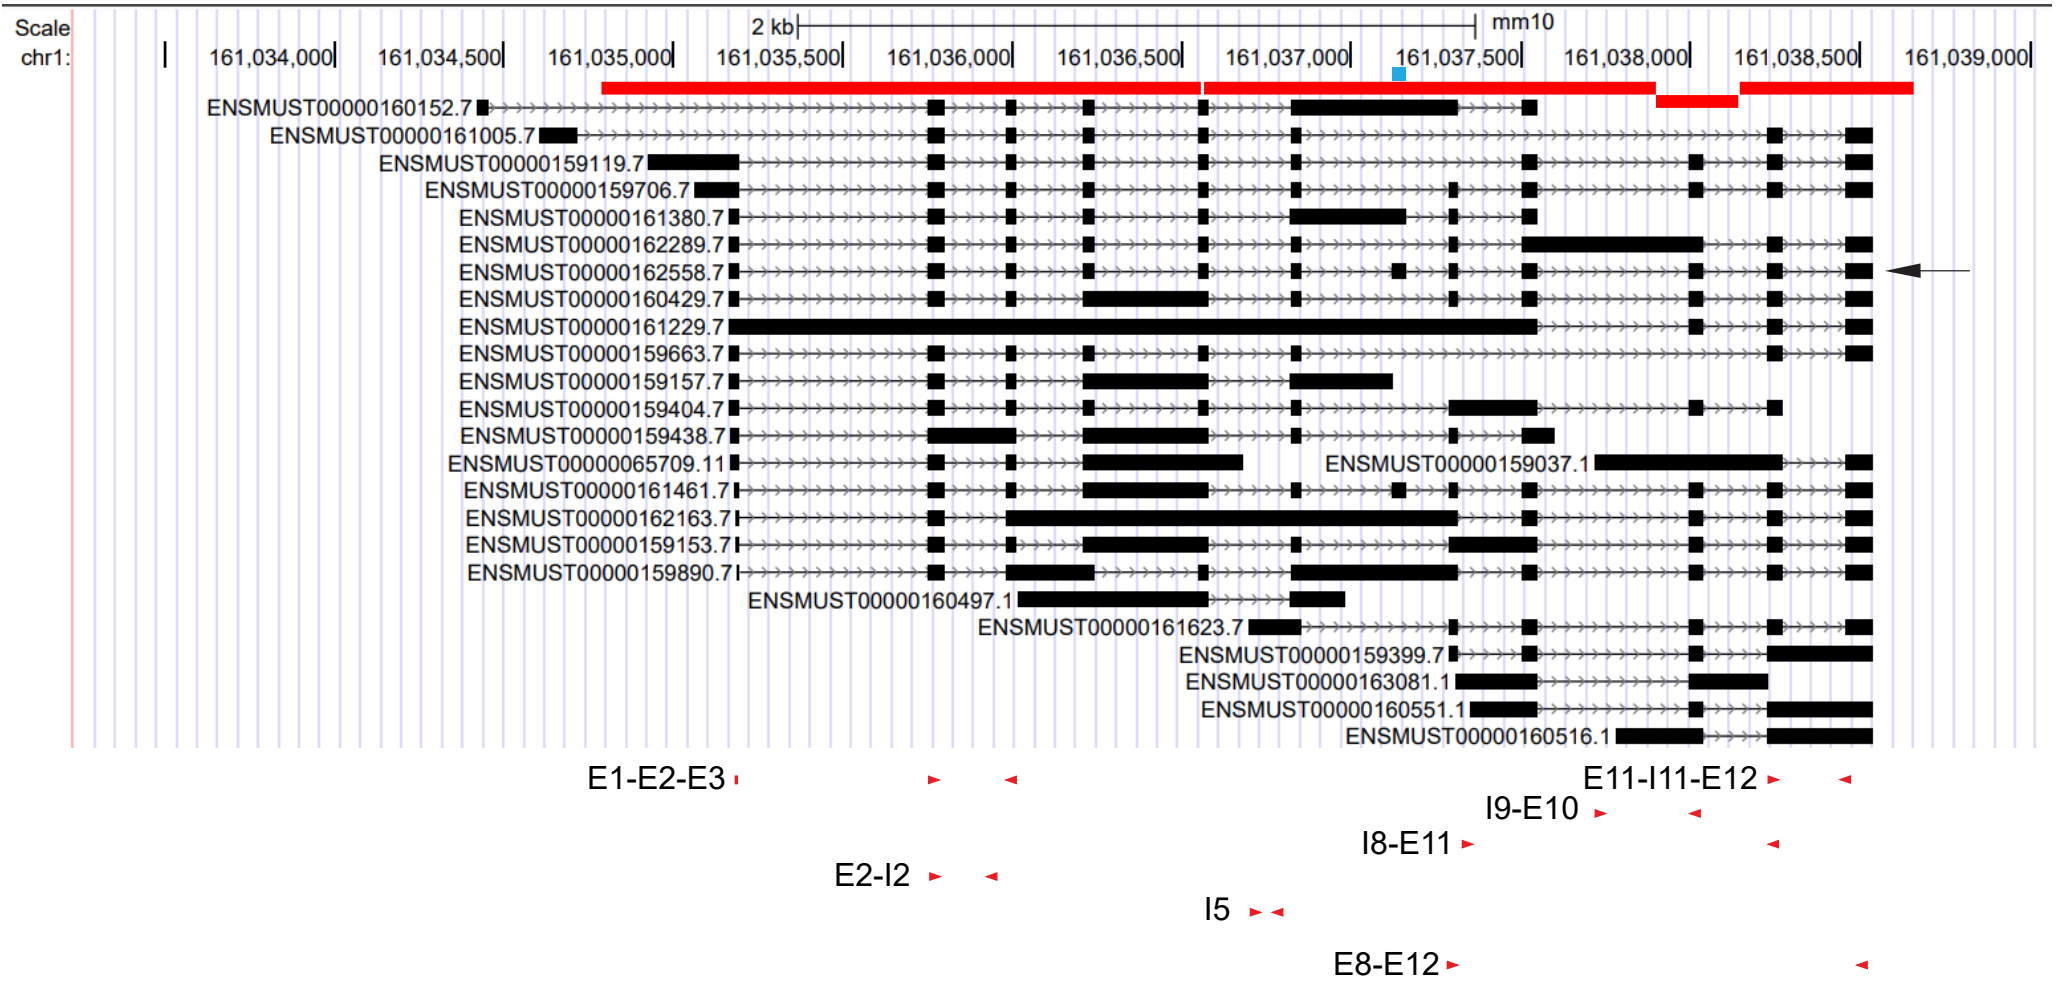

Supplementary Figure 3. Genomic track displaying *Gas5* locus. All 25 *Gas5* variants are plotted below the track. Arrow indicates *Gas5* variant ENSMUST00000162558.7. Bars shown in red and blue are *Gas5* capture-seq probes and gRNA target region, respectively. Arrow heads indicate primers used in Figure 2e.

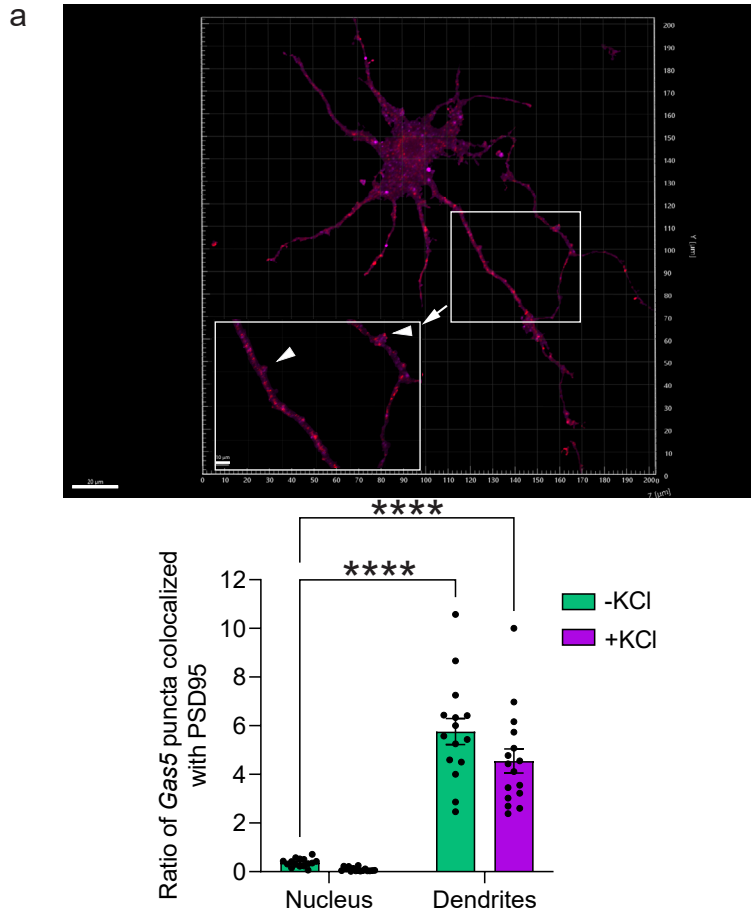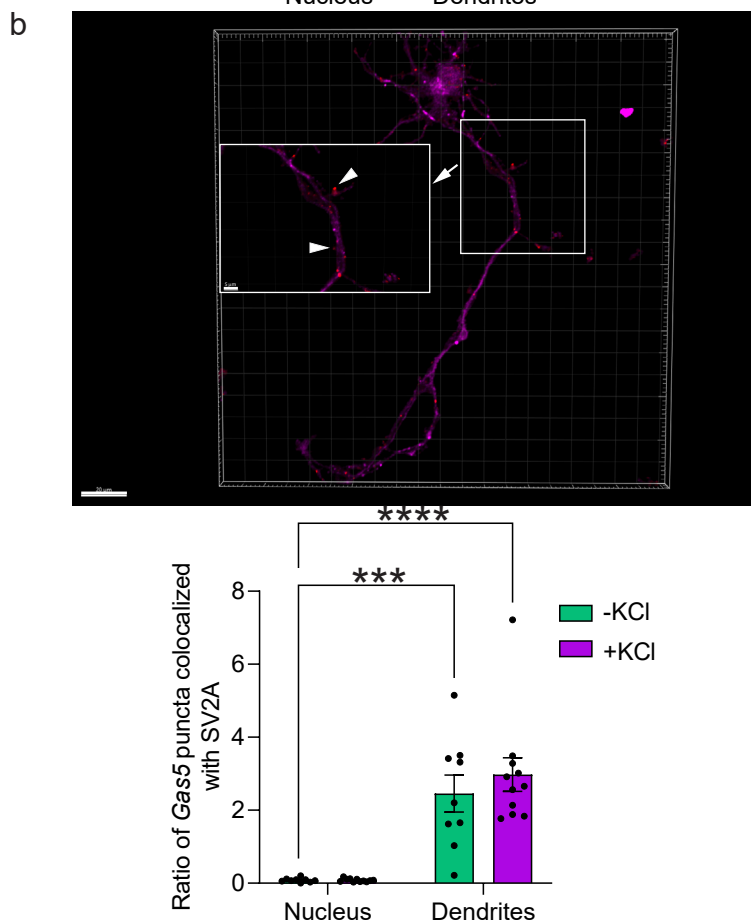

Supplementary Figure 4. Representative image showing the co-localized expression of the *Gas5* variant with the synaptic marker a) PSD95 and b) SV2A in primary cortical neurons. Arrowheads show co-localized *Gas5* expression at the dendritic spine. Scale bar, 20  $\mu\text{m}$ . Red represents *Gas5*; magenta represents a) PSD95 or b) SV2A protein. The boxed region is enlarged in the inserts. Scale bar, 10  $\mu\text{m}$  (PSD95), 5  $\mu\text{m}$  (SV2A). Graph showing ratio of *Gas5* puncta colocalized with a) PSD95 (-KCl,  $n = 15$  neurons, +KCl,  $n = 16$  neurons, two-way ANOVA,  $F_{1,58} = 182.1$ ,  $p < 0.0001$ ; Dunnett's post hoc tests: nucleus -KCl versus dendrites -KCl, \*\*\*\* $p < 0.0001$ , nucleus -KCl versus dendrites +KCl, \*\*\*\* $p < 0.0001$ ) or b) SV2A (-KCl,  $n = 9$  neurons, +KCl,  $n = 11$  neurons, two-way ANOVA,  $F_{1,36} = 59.31$ ,  $p < 0.0001$ ; Dunnett's post hoc tests: nucleus -KCl versus dendrites -KCl, \*\*\* $p < 0.001$ , nucleus -KCl versus dendrites +KCl, \*\*\*\* $p < 0.0001$ ) versus total number of non-colocalized puncta. Error bars represent S.E.M.

**a**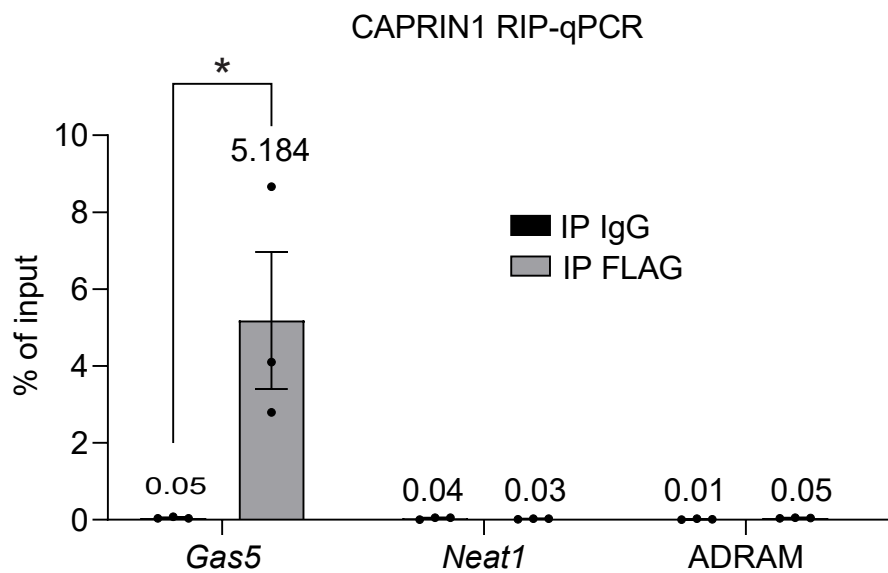**b**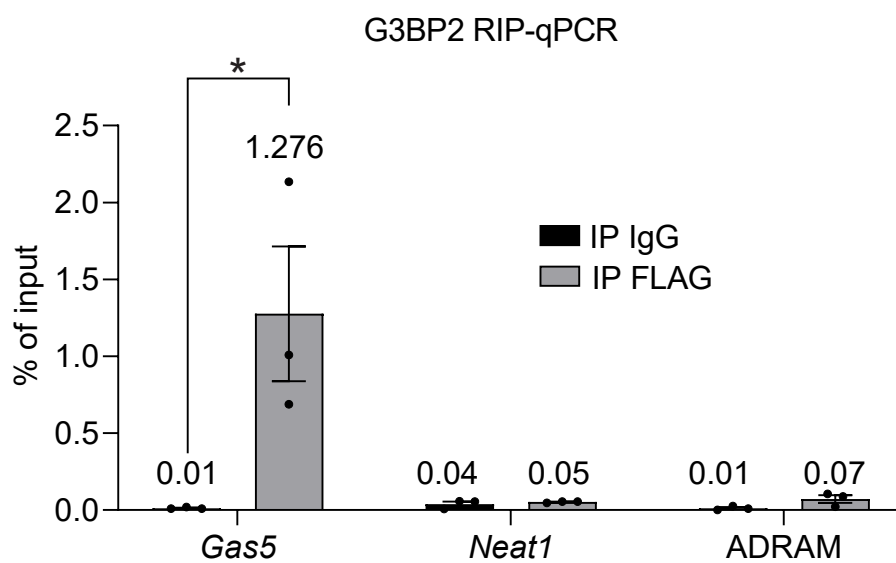**c**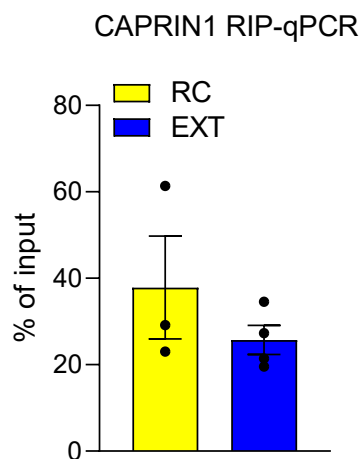

Supplementary Figure 5. *Gas5* RIP-qPCR of primary cortical neurons expressing FLAG-tagged a) CAPRIN1 or b) G3BP2. Percent of input is shown. Rabbit IgG control is used as control. Expression of lncRNA controls, ADRAM and *Neat1*, are indicated.  $n = 3$  biological independent replicates. Statistical significance was determined using two-tailed unpaired Student's t-test (CAPRIN1,  $t(4) = 2.884$ ,  $p = 0.0448$ ; G3BP2,  $t(4) = 2.884$ ,  $p = 0.0448$ ). \* $p < .05$ . Error bars represent S.E.M. c) *Gas5* CAPRIN1 RIP-qPCR of mice following fear extinction training (EXT) ( $n = 4$  biological independent replicates per group). Retention control (RC) ( $n = 3$  biological independent replicates per group) and percentage of input are indicated. Statistical significance was determined using two-tailed unpaired Student's t-test. Error bars represent S.E.M.

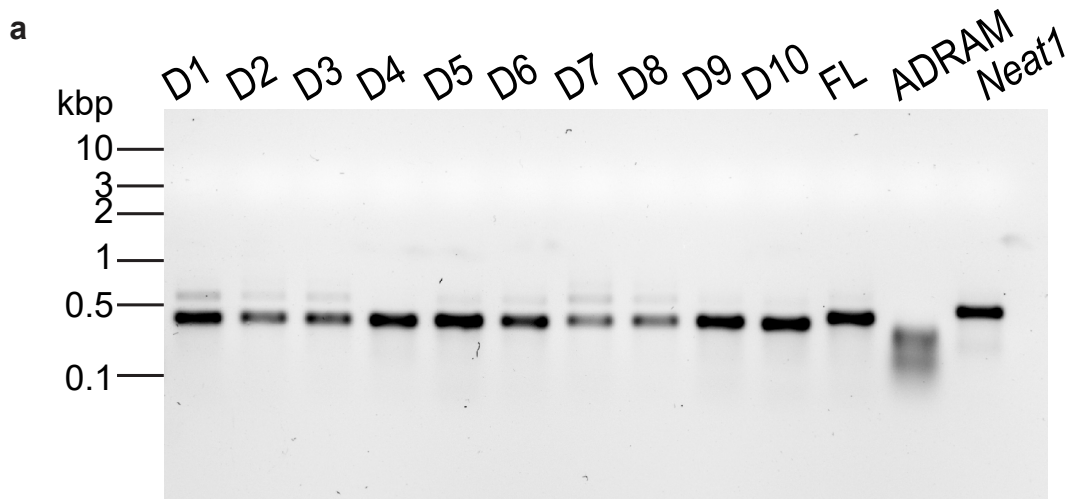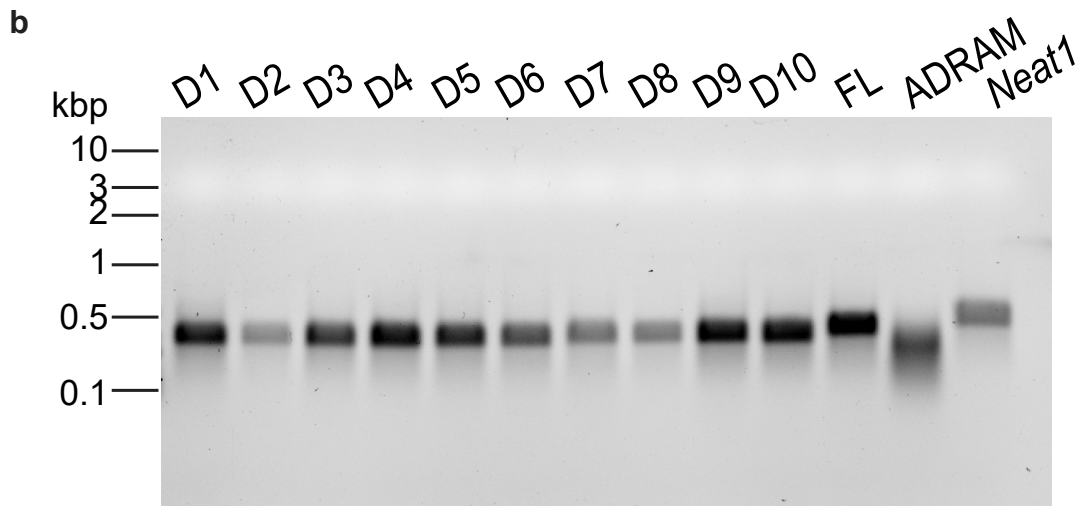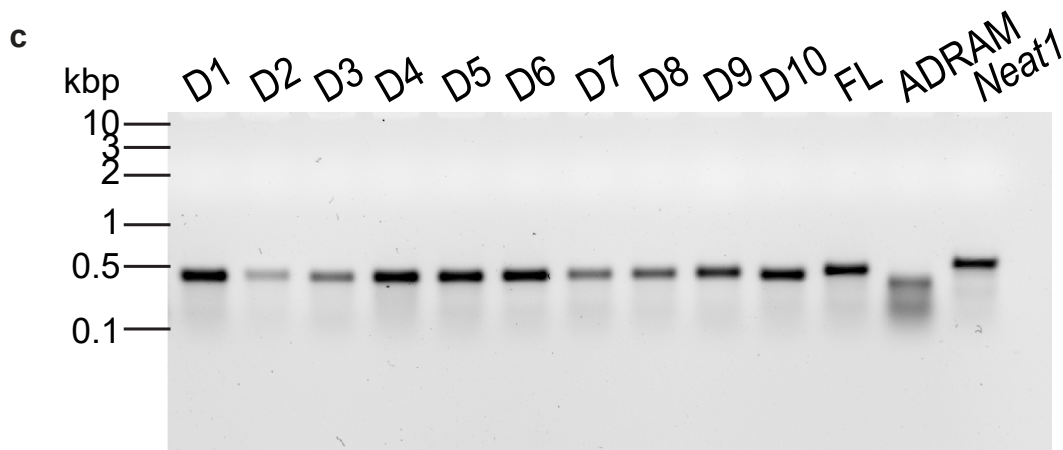

Supplementary Figure 6. RNA native gel (1%) displaying 1  $\mu$ g of mutant (D1-D10) and full-length (FL) *Gas5* RNAs a) before and b) after in-vitro RNA folding assay. Negative control RNAs, ADRAM and *Neat1*, are indicated. c) RNA native gel (1%) showing mutant (D1-D10) and full-length (FL) *Gas5* RNAs isolated after incubating with ILPFC protein extracts for 2 hr. Negative control lncRNAs, ADRAM and *Neat1*, are indicated.

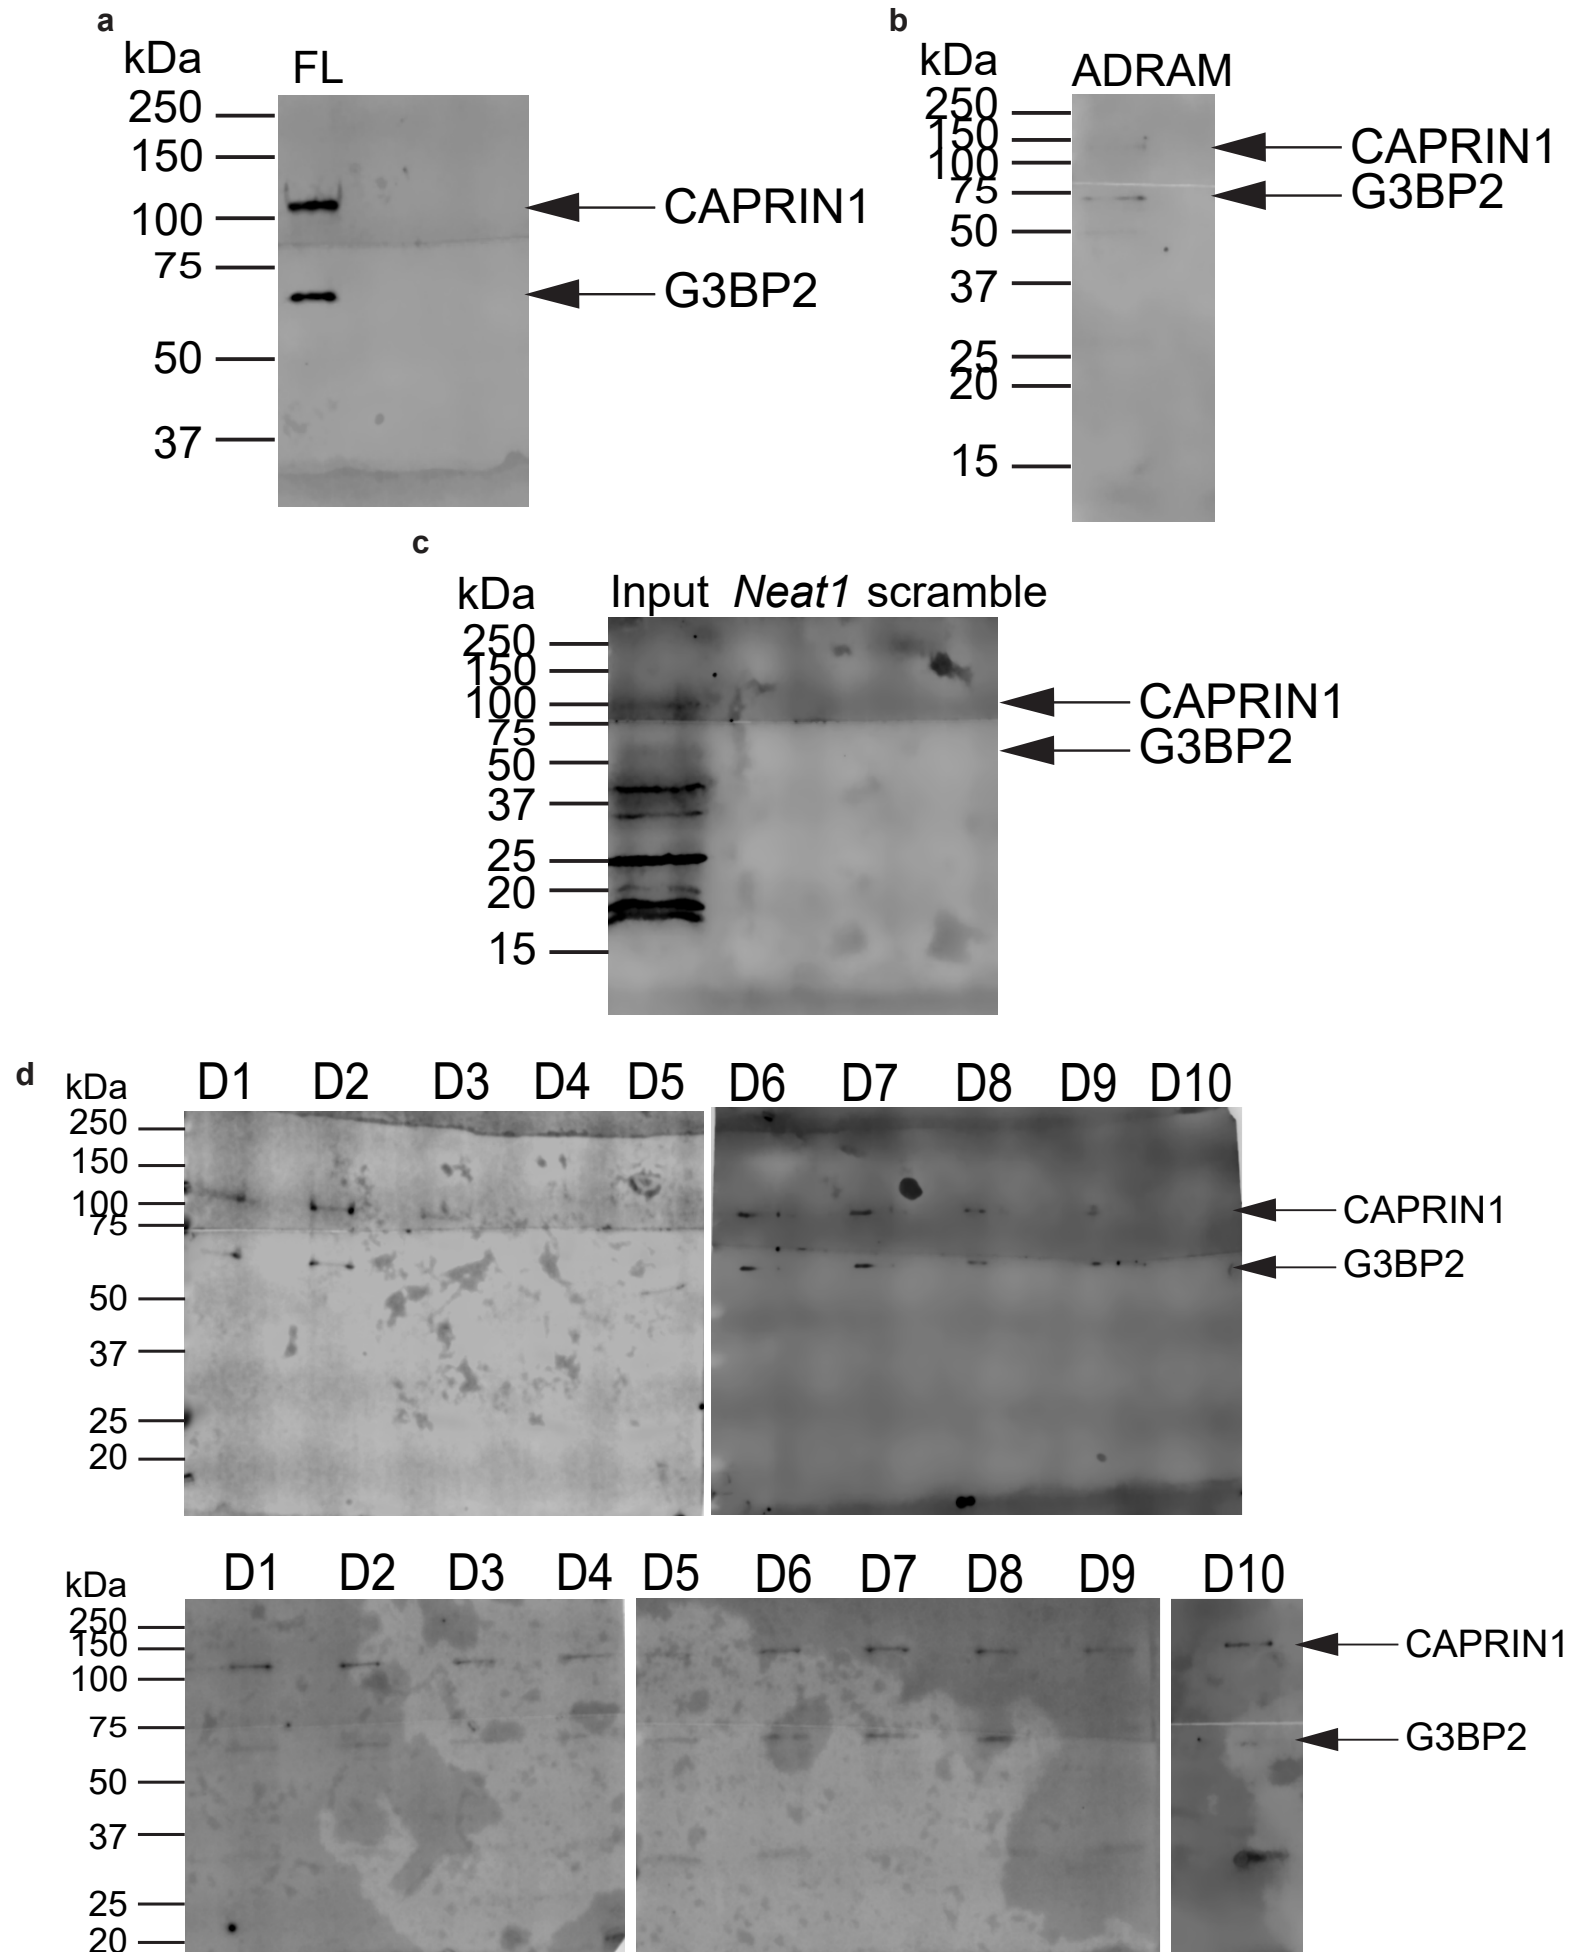

Supplementary Figure 7. Blots displaying CAPRIN1 and G3BP2 proteins after incubating a) full-length in-vitro transcribed *Gas5* or b) ADRAM or c) *Neat1* with ILPFC protein extracts. Input and scramble RNA control (5'-CCUGGUUUUUUAAGGAGUGUCGCCAGAGUGCCGCGAAUGAAAAA-3') are indicated. d) Blots displaying CAPRIN1 and G3BP2 proteins after incubating different fragments of in vitro transcribed *Gas5* with ILPFC protein extracts. Band intensity was quantified and plotted in Figure 4c and 4d.

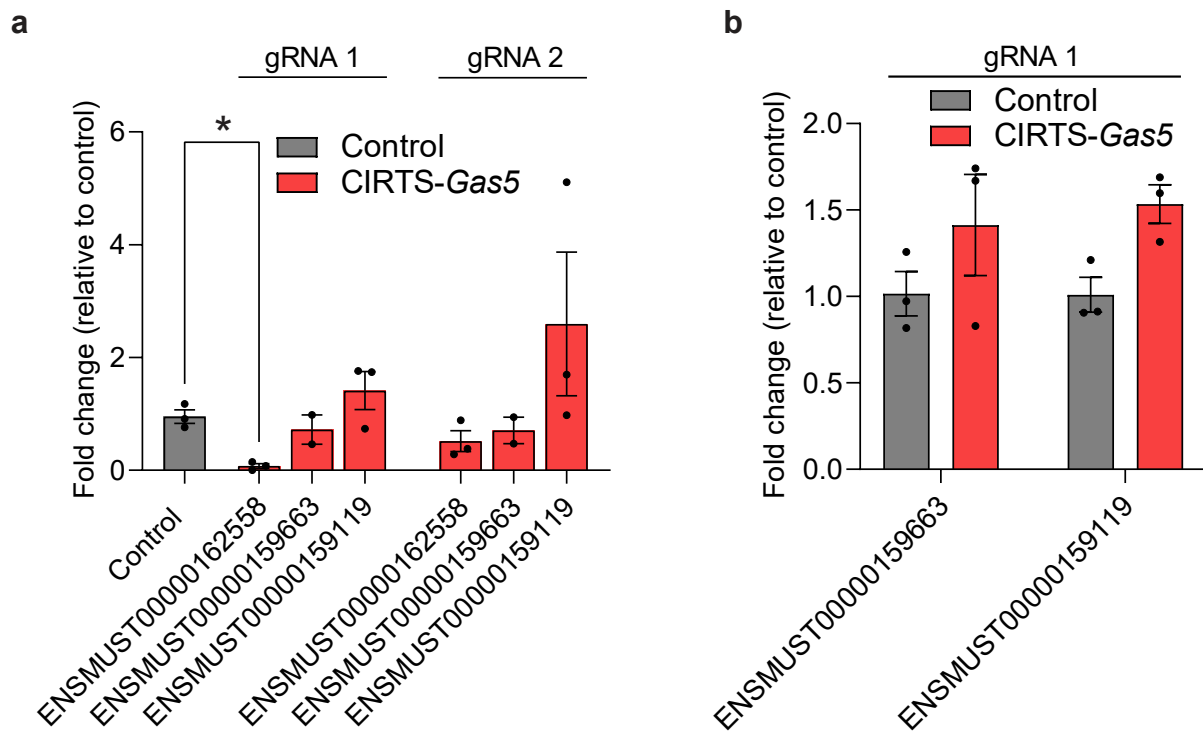

Supplementary Figure 8. a) In-vitro nuclease cleavage assay with two guides targeting *Gas5* variant ENSMUST00000162558. Guide 1 was used in the experiments described in Figure 5 and 6. *Gas5* knockdown was assessed by RT-qPCR. *Gas5* splice variants are indicated. n = 3 independent biological replicates per group. Statistical significance was determined using a two-tailed unpaired Student's t-test  $t(2.497) = 6.837$ ,  $p = 0.0112$ . \* $p < .05$ . Error bars represent S.E.M. b) To verify the specificity of the CIRTS-*Gas5* knockdown construct, qRT-PCR was performed on primary cortical neurons transduced with either control or CIRTS-*Gas5* virus revealing no effect on non-target *Gas5* splice variants ENSMUST00000159663 and ENSMUST00000159119. n = 3 independent biological replicates per group. Error bars represent S.E.M.



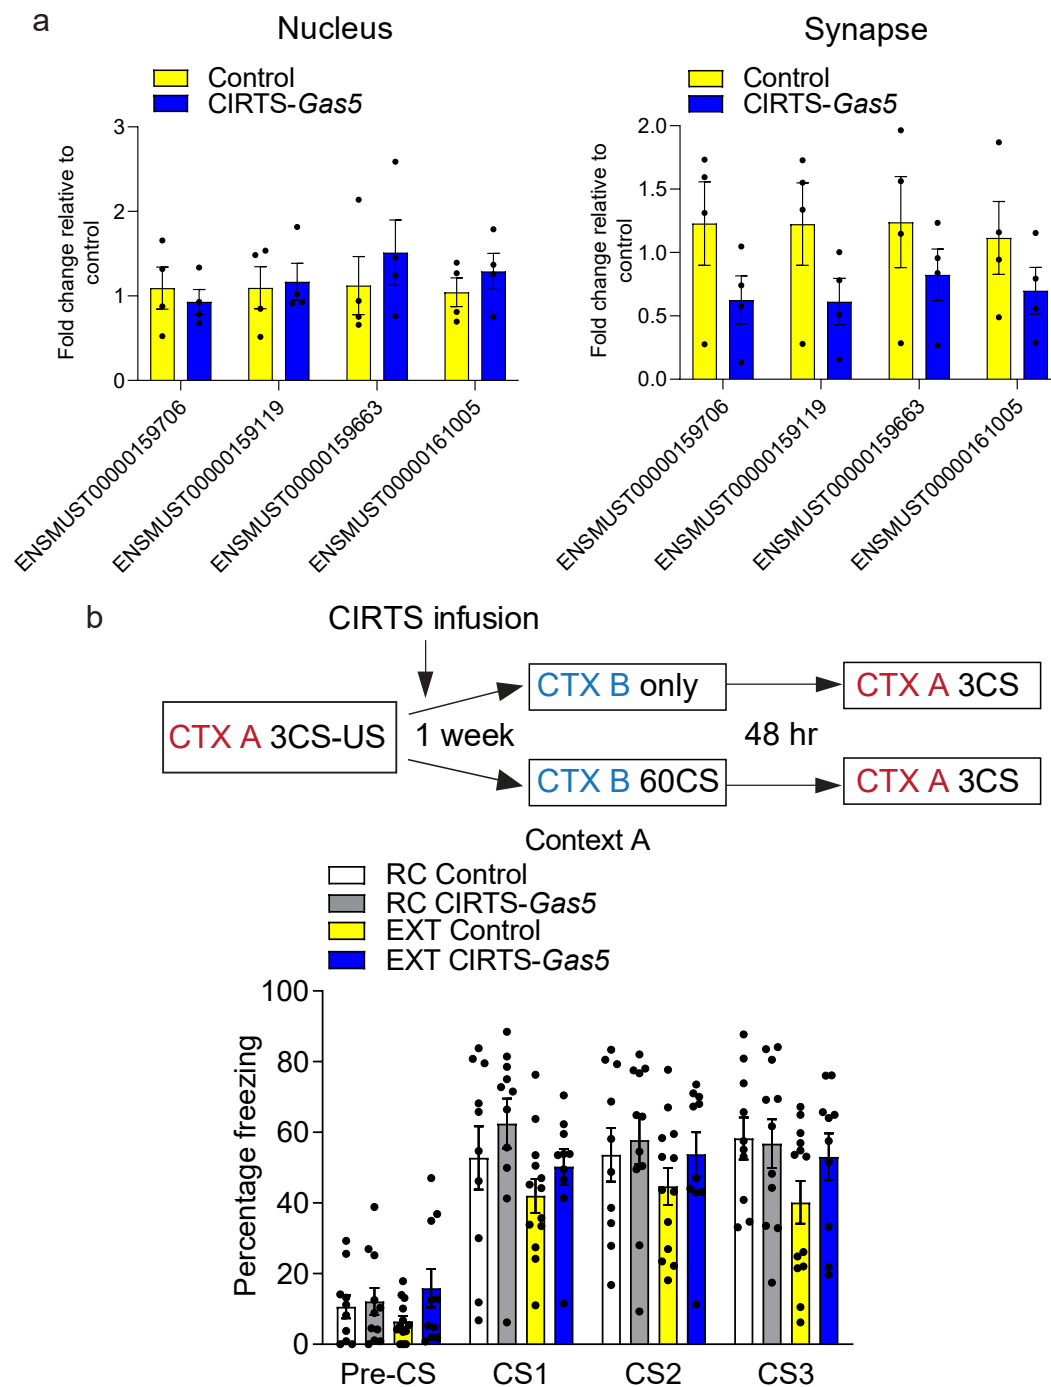

Supplementary Figure 9. a) RT-qPCR revealed no effect of targeted *Gas5* knockdown on other *Gas5* splice variants in the nucleus and at the synapse in the ILPFC.  $n = 4$  independent biological replicates per group. Statistical significance was determined using a two-tailed unpaired Student's *t*-test. all  $p > 0.05$ . Error bars represent S.E.M. b) There was no significant effect of *Gas5* knockdown on fear memory when tested in Context A (RC control,  $n = 10$  independent biological replicates per group, RC CIRT5-Gas5,  $n = 11$  independent biological replicates per group, EXT control,  $n = 13$  independent biological replicates per group, EXT CIRT5-Gas5,  $n = 8$  independent biological replicates per group, two-way ANOVA,  $F_{3,38} = 1.563$ ,  $p = 0.2143$ ; Dunnett's post hoc tests: all  $p > 0.05$ ). Error bars represent S.E.M.

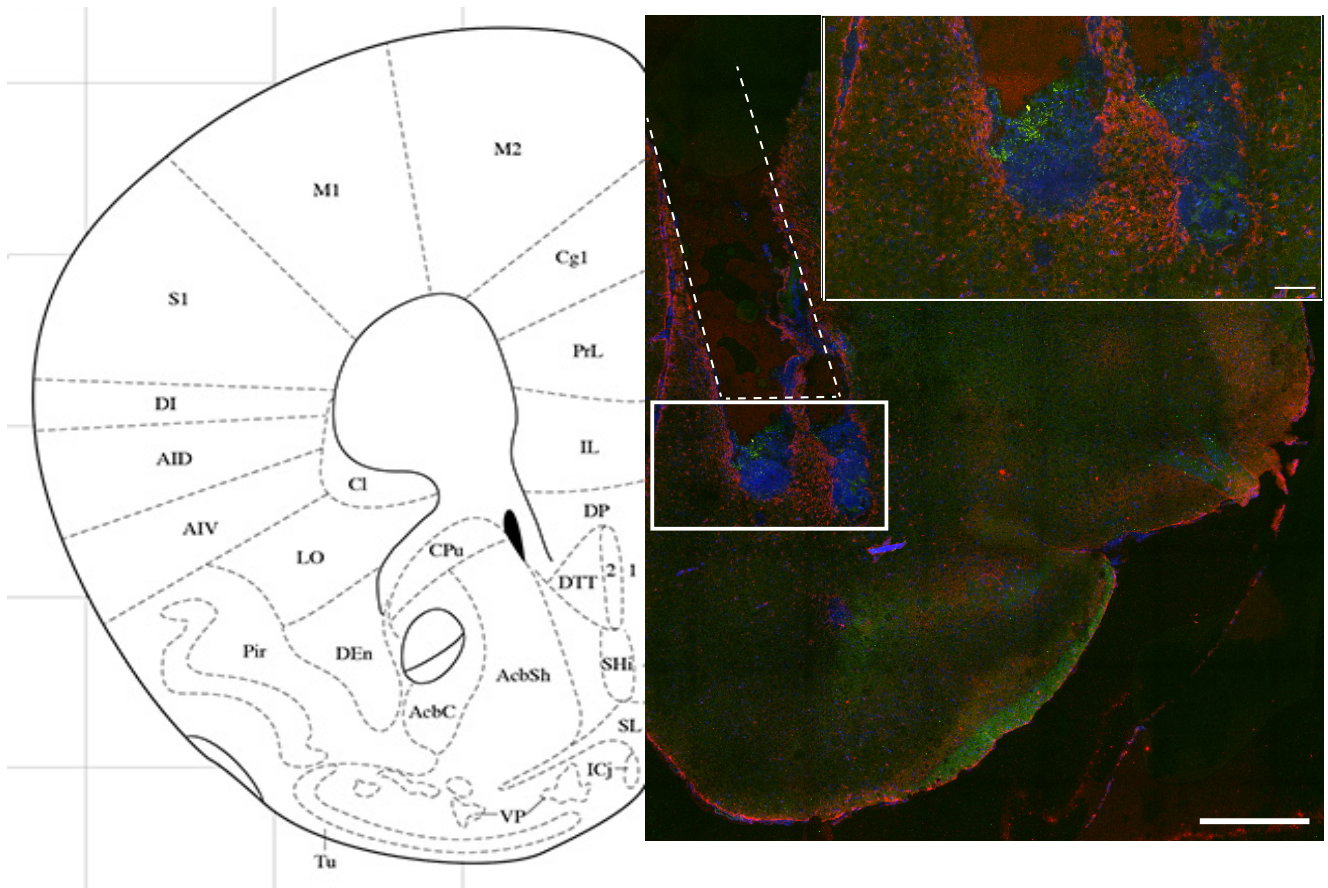

Supplementary Figure 10. Left: representative image of cannula placement in the ILPFC, right: transduction of CIRT5-Gas5 into the ILPFC of extinction-trained animal. Dotted lines represent the cannula track. Scale bar, 500  $\mu\text{m}$ . Red, Gas5; blue, DAPI; green, CIRT5. The boxed region is enlarged in the inserts. Scale bar, 100  $\mu\text{m}$ .

a

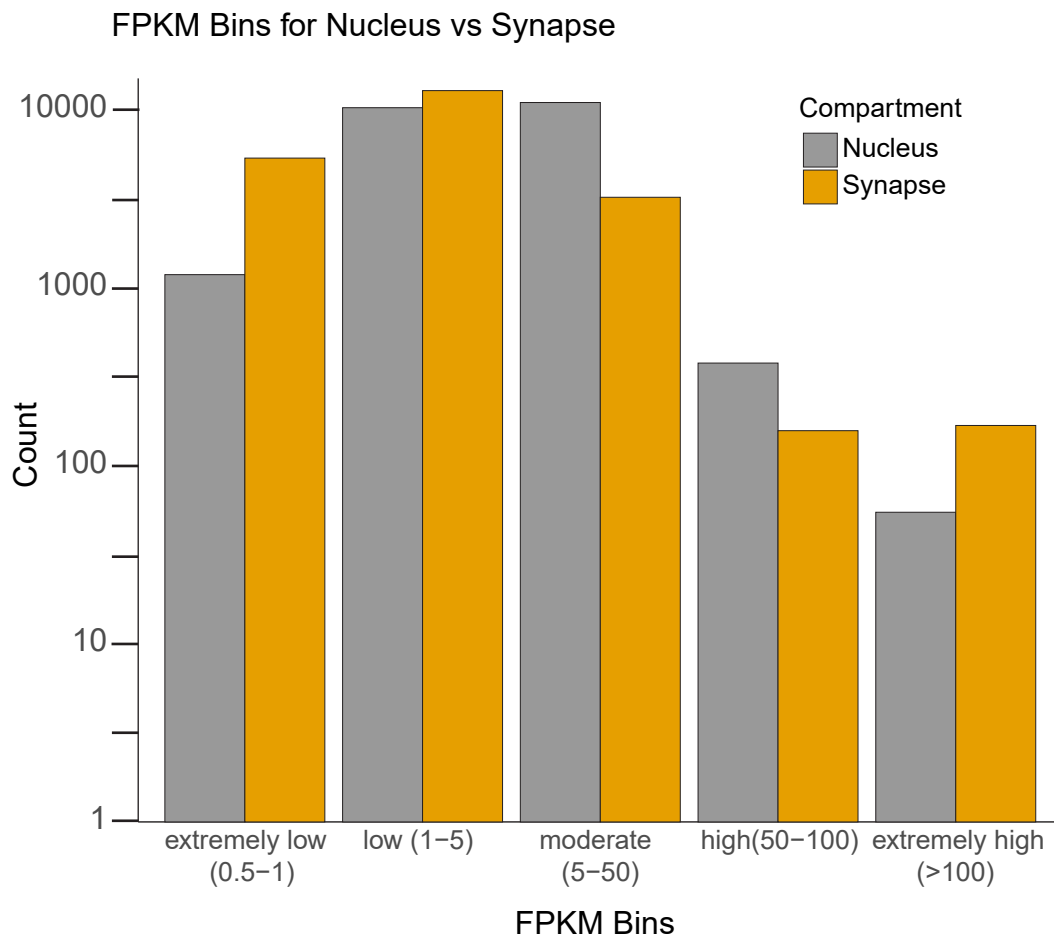

b

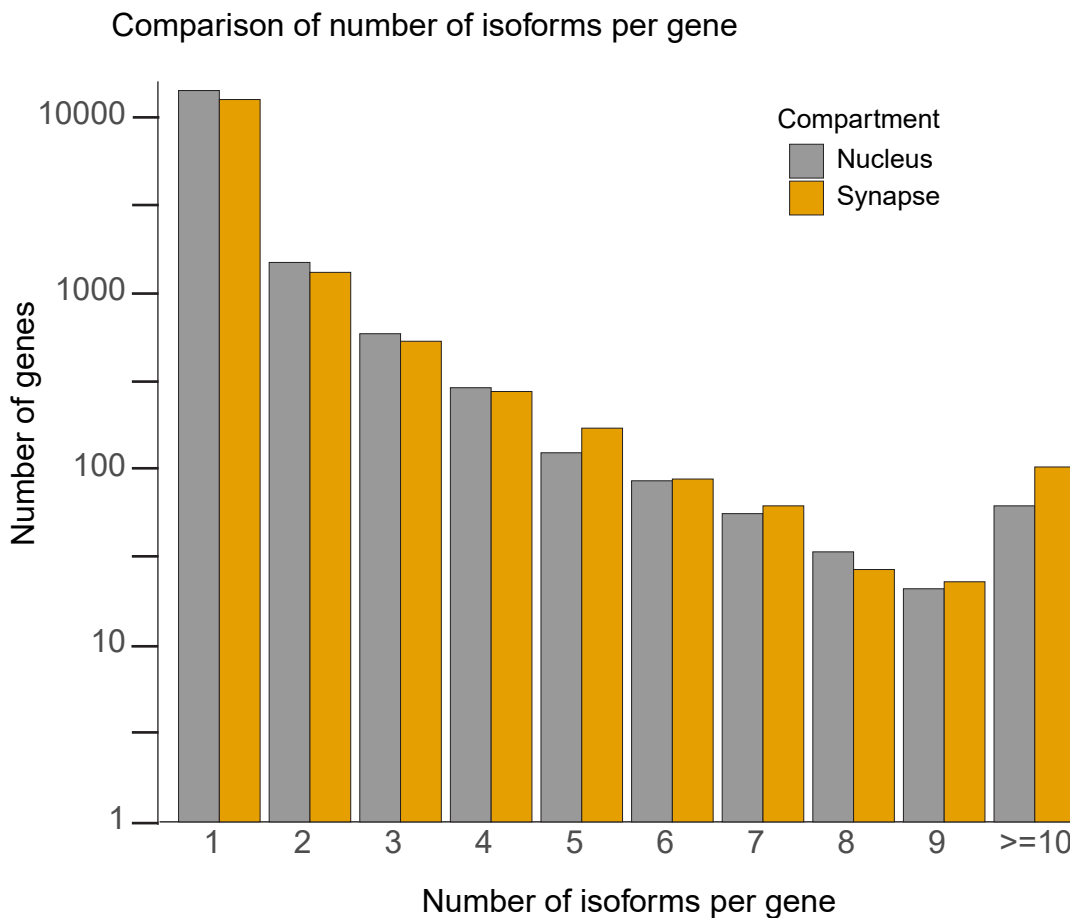

Supplementary Figure 11. a) Distribution of FPKM counts from nucleus and synapse capture-seq data in five categories: i) extremely low expression ( $0.5 < \text{FPKM} \leq 1$ ), ii) low expressed ( $1 < \text{FPKM} \leq 5$ ), iii) moderate expression ( $5 < \text{FPKM} \leq 50$ ), iv) high expression ( $50 < \text{FPKM} \leq 100$ ), and v) extremely high expression ( $\text{FPKM} > 100$ ). b) Distribution of the number of isoforms per gene for transcripts with an FPKM  $> 0.5$  in nucleus and synapse capture-seq data.

## Supplemental Table 1

### Primers and CIRTS gRNA sequence

#### Primers for quantitative PCR

| Name                          | Forward Sequence (5'-3') | Reverse Sequence (5'-3') |
|-------------------------------|--------------------------|--------------------------|
| Exon 11 - Intron 11 - Exon 12 | GCTCCTGTGACAAGTGGACA     | GCACCTGCAACAACCAACAG     |
| Intron 9 - Exon 10            | CTGTGCCACTGACTTAACCC     | TCAGAATGAAGGACCGGAAA     |
| Intron 8 - Exon11             | AGGTACTGTTAGTGATGATC     | ATGTCCACTTGTACAGGAG      |
| Exon 2 - Intron 2             | AATGGCAGTGTGGACCTCTG     | TCAGTCCCCTTCTTCACGGA     |
| Intron 5                      | GAACAAATACTGACTACCTG     | TGCCCCACAATAAATGTCAA     |
| Exon 1 - Exon 2 - Exon 3      | ATTCTGAGCAGGAATGGCAG     | TCCTCCTTTGCCACAGAACT     |
| Exon 8 - Exon 12              | GTACAAATAATGGTTTGAAT     | TGTTATAATACACTTTAATG     |
| <i>Gas5</i>                   | GGAAGCTGGATAACAGAGCGA    | GCATGCAACCAGTTAACTTTCA   |
| 18S rRNA                      | CTGGATACCGCAGCTAGGAA     | GAATTTACCTCTAGCGGCG      |
| <i>Pgk</i>                    | TGCACGCTTCAAAAGCGCACG    | AAGTCCACCCTCATCACGCC     |
| <i>Rpph1</i>                  | CTCTACGCTTGGGCAGAC       | CTCACCTCAGCCATTGAACT     |
| <i>Rmrp</i>                   | CCTGTTTCCTAGGCTACATACG   | GCGGGCTAACAGTGACTT       |
| <i>Rn7sk</i>                  | TCGGTCAAGGGTATACGAGTAG   | TTTGGATGTGTCTGGAGTCTTG   |
| 9330121K16Rik                 | AGTAGAGTTAGGGTGGGATAGG   | ACAGGCACTGATGTGAGTTAG    |
| Gm28437                       | CAGGATTCTTCTGAGCGTTCTAT  | TGGGACTTCTAGAGGGTTAAGT   |
| Gm47305                       | AGACAGGAGGATCGCTTGA      | TCACCATATTGATGCCGAACCTA  |
| <i>Cyrano</i>                 | GGCTCCATAGAAGCGACATAC    | CCCAAGAGCTGGGCATAAA      |
| <i>Meg3</i>                   | ATTAGGCCAAAGCCATCATCT    | GGCGCTTCCAATCGATTTAC     |
| <i>ENSMUST00000159663.7</i>   | GGAAGCTGGATAACAGAGCGA    | CACAGGAGCCCTTTCAAACCT    |
| <i>ENSMUST00000159119.7</i>   | TGAAAGGTATTAATGGGTCACCTC | TCTGACACCATCTTCTATTTGAGC |
| <i>ENSMUST00000161005.7</i>   | GAAGGTCGCCGAGTGCT        | GAGATCCCACAAGATGTCCCAT   |

#### Primers for *in-vitro* Transcription

| Name                           | Sequence (5'-3')                       |
|--------------------------------|----------------------------------------|
| T7 <i>Gas5</i> del1-50 Forward | TAATACGACTCACTATAGGGTGATGGGACATCTTGTG  |
| T7 <i>Gas5</i> Forward         | TAATACGACTCACTATAGGAGCCTTTCCGGAGCTGTGC |
| <i>Gas5</i> Reverse            | TTCATGTTATAATACACTTT                   |
| <i>Gas5</i> del458-504 Reverse | ATTTGAGCCTCCATCCAGGC                   |
| T7 ADRAM Forward               | TAATACGACTCACTATAGGTTTGCCTCAACTCCACTA  |
| ADRAM Reverse                  | GCAGAGGTACAAACTTTC                     |
| T7 <i>Neat1</i> Forward        | TAATACGACTCACTATAGGAAGAAGCTTTAGATGACG  |
| <i>Neat1</i> Reverse           | TTGGCTTGAAAATGTAAG                     |

#### CIRTS gRNA

| Name             | Sequence (5'-3')               |
|------------------|--------------------------------|
| <i>Gas5</i> gRNA | AGCAAGCCAGCCAAATGAACAAGCATGCAA |
| Control Scramble | GATACATCATCTCTGTATTAGGCTCCCAAC |
