# Supplementary material for: Fear extinction is regulated by the activity of long noncoding RNAs at the synapse
Source: PubMed Central journal article supplement (PMC10665438; doi:10.1038/s41467-023-43535-1), 2023-11-22
Supplement: 41467_2023_43535_MOESM3_ESM.pdf [file 41467_2023_43535_MOESM3_ESM.pdf]

## **Description of Additional Supplementary Files**

File Name: Supplementary Data 1

Description: Transcripts identified in the nucleus and synapse lncRNA capture-seq

File Name: Supplementary Data 2

Description: Synapse-enriched transcripts identified in the lncRNA capture-seq

File Name: Supplementary Data 3

Description: Sheet 1, Transcripts identified in the synapse RC and synapse EXT RNA-seq;  
Sheet 2, Top10 capture-seq candidates identified in the synapse RC and EXT RNAseq

File Name: Supplementary Data 4

Description: Genomic coordinates for all captured regions in the lncRNA capture-seq

File Name: Supplementary Data 5

Description: Genomic coordinates for the captured Gas5 region in the lncRNA captureseq

File Name: Supplementary Data 6

Description: Sheet 1, Gas5 RIP targets identified in the RC and EXT group; Sheet 2, Gas5 RIP targets identified exclusively in the RC and EXT group, and overlap in both
