# Supplementary material for: Fear extinction is regulated by the activity of long noncoding RNAs at the synapse
Source: Nat Commun. 2023 Nov 22;14:7616. doi: 10.1038/s41467-023-43535-1 (PMC10665438; doi:10.1038/s41467-023-43535-1)
Supplement: Supplementary file 11 — Source Data [file 41467_2023_43535_MOESM11_ESM.xlsx]

## Sheet: Figure 1c
Figure 1c
Classification	Number of transcripts
Extragenic	741
Intragenic	1324
Proximal	35
Antisense	483

## Sheet: Figure 1d
Figure 1d
Gene name	Nucleus 1	Nucleus 2	Nucleus 3	Nucleus 4	Nucleus 5	Nucleus 6	Synapse 1	Synapse 2	Synapse 3	Synapse 4	Q- value
Rpph1	397.582	534.557	533.009	592.237	604.23	526.959	6614.59	5864.48	367.739	5638.44	0.00154447
Rmrp	279.449	430.723	407.939	524.024	490.484	488.769	3803.12	3303.67	322.46	2054.85	0.00696188
Gas5	4.01819	3.53764	4.59096	3.1625	4.80316	4.56548	330.972	662.34	4099.84	863.993	0.000627536
Rn7sk	87.3282	111.947	87.8919	112.664	139.656	133.955	612.164	858.92	2945.26	1218.76	0.00884781
Oip5os1	116.324	85.1091	100.317	103.274	106.337	74.8953	1713.42	1126.84	208.792	1220.6	0.000161435
9330121K16Rik	55.6742	39.3925	51.5754	37.4218	39.8945	34.2387	1182.45	901.677	201.423	1244.3	1.04815e-05
Gm28437	8.10414	5.41152	5.79872	3.79278	5.93441	3.8852	340.404	172.201	2623.1	377.864	0.0108927
Rny1	6.84544	10.5814	8.89516	6.24231	13.6456	14.352	289.719	365.413	2363.66	366.39	0.00409768
Rny3	1.62306	4.44469	3.66174	3.96362	4.19513	10.0409	191.543	373.622	1853.51	295.755	0.00302467
Gm47305	18.2874	21.6526	23.8538	23.4729	83.1214	27.0998	354.807	470.565	918.903	672.91	0.0137843

## Sheet: Figure 1e
Figure 1e
		18S		Rpph1						Rmrp						Rn7sk						9330121K16Rik						GM28437						GM47305						Oip5os1						Gas5
	CT1	CT2	Average CT	CT1	CT2	Average CT	∆CT	∆∆CT	Fold change	CT1	CT2	Average CT	∆CT	∆∆CT	Fold change	CT1	CT2	Average CT	∆CT	∆∆CT	Fold change	CT1	CT2	Average CT	∆CT	∆∆CT	Fold change	CT1	CT2	Average CT	∆CT	∆∆CT	Fold change	CT1	CT2	Average CT	∆CT	∆∆CT	Fold change	CT1	CT2	Average CT	∆CT	∆∆CT	Fold change	CT1	CT2	Average CT	∆CT
RC1	15.97	17.11	16.54	27.19	27.11	27.15	9.5245	-0.85875	1.81347	28.07	28.23	28.15	10.5245	0.26625	0.831478	20.85	20.78	20.815	3.1895	0.20875	0.865287	28.81	28.76	28.785	11.1595	0.4575	0.728247	16.68	16.63	16.655	-0.9705	0.325	0.798298													26.88	27.06	26.97	9.3445
RC2	18.57	18.58	18.575	27.32	27.19	27.255	9.6295	-0.75375	1.68617	26.71	27.33	27.02	9.3945	-0.86375	1.81976	19.83	19.63	19.73	2.1045	-0.87625	1.8356	26.61	26.97	26.79	9.1645	-1.5375	2.90291	14.95	15.1	15.025	-2.6005	-1.305	2.47084	17.9	17.93	17.915	0.2895	-0.965	1.95206	29.13	29.12	29.125	11.4995	-1.04667	2.06575	26.26	26.16	26.21	8.5845
RC3	16.86	17.09	16.975	26.52	26.41	26.465	8.8395	-1.54375	2.91551	26.1	25.93	26.015	8.3895	-1.86875	3.65216	18.88	19.05	18.965	1.3395	-1.64125	3.11936	25.7	26.07	25.885	8.2595	-2.4425	5.43583	14.18	14.4	14.29	-3.3355	-2.04	4.11246	17.16	17.18	17.17	-0.4555	-1.71	3.27161	28.01	28.32	28.165	10.5395	-2.00667	4.01853	25.41	25.48	25.445	7.8195
RC4	20.61	21.35	20.98	31.03	31.3	31.165	13.5395	3.15625	0.112169	30.21	30.49	30.35	12.7245	2.46625	0.180961	22.87	22.96	22.915	5.2895	2.30875	0.201835	31.96	31.74	31.85	14.2245	3.5225	0.0870206	19.05	19.65	19.35	1.7245	3.02	0.123279	21.4	21.71	21.555	3.9295	2.675	0.156583	33.18	33.27	33.225	15.5995	3.05333	0.120463	29.96	30.34	30.15	12.5245
EXT1	16.22	16.35	16.285	26.02	25.9	25.96	8.3345	-2.04875	4.13747	26.48	26.58	26.53	8.9045	-1.35375	2.55576	18.56	18.74	18.65	1.0245	-1.95625	3.88052	25.2	25.68	25.44	7.8145	-2.8875	7.39987	13.53	13.63	13.58	-4.0455	-2.75	6.72717	17.46		17.46	-0.1655	-1.42	2.67586							24.69	24.69	24.69	7.0645
EXT2	15.96	16.5	16.23	26.66	26.26	26.46	8.8345	-1.54875	2.92564	26.32	26.3	26.31	8.6845	-1.57375	2.97677	19.21	19.13	19.17	1.5445	-1.43625	2.70617	24.92	25.14	25.03	7.4045	-3.2975	9.8321	13.02	13.24	13.13	-4.4955	-3.2	9.18959													24	24.17	24.085	6.4595
EXT3	16.17	15.92	16.045	26.19	26.24	26.215	8.5895	-1.79375	3.46715	26.78	26.73	26.755	9.1295	-1.12875	2.18669	19.08	19.64	19.36	1.7345	-1.24625	2.37224	26.15	26.54	26.345	8.7195	-1.9825	3.95177	13.54	13.85	13.695	-3.9305	-2.635	6.21175													24.69	24.56	24.625	6.9995
EXT4	17.87	17.96	17.915	26.79	27.29	27.04	9.4145	-0.96875	1.95714	25.63	25.77	25.7	8.0745	-2.18375	4.54333	18.66	19.3	18.98	1.3545	-1.62625	3.0871	25.95	26.01	25.98	8.3545	-2.3475	5.08942	13.81	13.87	13.84	-3.7855	-2.49	5.61778	17.61	17.43	17.52	-0.1055	-1.36	2.56685	28.69	29.45	29.07	11.4445	-1.10167	2.14602	24.71	25.04	24.875	7.2495
EXT5	17.53	18.06	17.795	27.14	26.44	26.79	9.1645	-1.21875	2.32745	25.4	25.55	25.475	7.8495	-2.40875	5.31014	19.08	19.02	19.05	1.4245	-1.55625	2.94088	25.21	25.97	25.59	7.9645	-2.7375	6.66914	13.33	13.57	13.45	-4.1755	-2.88	7.3615	17.05	17.08	17.065	-0.5605	-1.815	3.5186	27.72	28.16	27.94	10.3145	-2.23167	4.69676	24.69	25.04	24.865	7.2395
EXT6	18.83	19	18.915	26.55	28.76	27.655	10.0295	-0.35375	1.27788	25.58	28.24	26.91	9.2845	-0.97375	1.96394	19.34	19.25	19.295	1.6695	-1.31125	2.48156	28.38	26.4	27.39	9.7645	-0.9375	1.91521	14.62	14.39	14.505	-3.1205	-1.825	3.54307	16.91	17.2	17.055	-0.5705	-1.825	3.54307	28.24	28.52	28.38	10.7545	-1.79167	3.46215
			17.6255				10.3833						10.2583						2.98075						10.702						-1.2955						1.2545						12.5462						9.56825
		18S		Rpph1						Rmrp						Rn7sk						9330121K16Rik						GM28437						GM47305						Oip5os1						Gas5
	CT1	CT2	Average CT	CT1	CT2	Average CT	∆CT	∆∆CT	Fold change	CT1	CT2	Average CT	∆CT	∆∆CT	Fold change	CT1	CT2	Average CT	∆CT	∆∆CT	Fold change	CT1	CT2	Average CT	∆CT	∆∆CT	Fold change	CT1	CT2	Average CT	∆CT	∆∆CT	Fold change	CT1	CT2	Average CT	∆CT	∆∆CT	Fold change	CT1	CT2	Average CT	∆CT	∆∆CT	Fold change	CT1	CT2	Average CT	∆CT
RC1	21.36	21.31	21.335	28.6	28.76	28.68	5.42611	-1.19917	2.29607	28.36	28.44	28.4	5.14611	-0.881667	1.8425	19.46	19.96	19.71	-3.54389	-0.809167	1.7522	29.36	29.41	29.385	6.13111	-2.12167	4.35196	15	15.03	15.015	-8.23889	-0.6975	1.62169	20.95	21.04	20.995	-2.25889	-1.42167	2.67895	29.77	30.08	29.925	6.67111	-1.43333	2.7007	28.51	28.53	28.52	5.26611
RC2	23.3	23.41	23.355	31.17	31.02	31.095	7.84111	1.21583	0.430524	30.44	30.24	30.34	7.08611	1.05833	0.480186	20.55	21.67	21.11	-2.14389	0.590833	0.663959	31.86	31.73	31.795	8.54111	0.288333	0.818847	14.45	14.22	14.335	-8.91889	-1.3775	2.59818	23.56	23.6	23.58	0.326111	1.16333	0.44648	31.17	32.47	31.82	8.56611	0.461667	0.726147	28.63	28.66	28.645	5.39111
RC3	22.3	22.32	22.31	30.48	30.57	30.525	7.27111	0.645833	0.639124	29.7	29.78	29.74	6.48611	0.458333	0.727827	20.13	20.61	20.37	-2.88389	-0.149167	1.10893	31.39	31.41	31.4	8.14611	-0.106667	1.07674	13.7	13.59	13.645	-9.60889	-2.0675	4.1916	23.22	22.89	23.055	-0.198889	0.638333	0.642455	31.54	31.75	31.645	8.39111	0.286667	0.819794	28.22	28.14	28.18	4.92611
RC4	23	22.84	22.92	30.26	30.91	30.585	7.33111	0.705833	0.613088	29.92	29.91	29.915	6.66111	0.633333	0.644685	20.12	21.22	20.67	-2.58389	0.150833	0.90073	31.06	31.17	31.115	7.86111	-0.391667	1.31191	13.3	13.39	13.345	-9.90889	-2.3675	5.16046	23.16	23.37	23.265	0.0111111	0.848333	0.555426	30.81	31.44	31.125	7.87111	-0.233333	1.17555	27.94	27.84	27.89	4.63611
EXT1	21.84	21.94	21.89	29.89	30.13	30.01	6.75611	0.130833	0.913304	30.08	29.57	29.825	6.57111	0.543333	0.686184	20.31	20.61	20.46	-2.79389	-0.0591667	1.04186	29.28	29.21	29.245	5.99111	-2.26167	4.79545	12.8	12.76	12.78	-10.4739	-2.9325	7.63432	21.63	21.58	21.605	-1.64889	-0.811667	1.75524	30.53	30.57	30.55	7.29611	-0.808333	1.75119	26.77	26.82	26.795	3.54111
EXT2	20.81	20.95	20.88	27.38	27.45	27.415	4.16111	-2.46417	5.51808	26.03	26.01	26.02	2.76611	-3.26167	9.5909	18.11	18.15	18.13	-5.12389	-2.38917	5.23855	32.26	32.45	32.355	9.10111	0.848333	0.555426	17.7	17.84	17.77	-5.48389	2.0575	0.240232	19.44	19.37	19.405	-3.84889	-3.01167	8.06496	31.47	31.96	31.715	8.46111	0.356667	0.780967	31.49	31.85	31.67	8.41611
EXT3	23.03	23.05	23.04	30.3	30.22	30.26	7.00611	0.380833	0.767994	29.16	29.33	29.245	5.99111	-0.0366667	1.02574	20.29	20.31	20.3	-2.95389	-0.219167	1.16406	32.46	32.37	32.415	9.16111	0.908333	0.5328	16.81	17.72	17.265	-5.98889	1.5525	0.340919	21.38	22.12	21.75	-1.50389	-0.666667	1.5874	32.92	31.65	32.285	9.03111	0.926667	0.526072	31.46	29.89	30.675	7.42111
EXT4	22.49	22.53	22.51	30.67	30.64	30.655	7.40111	0.775833	0.584051	29.51		29.51	6.25611	0.228333	0.85362	20.8	20.79	20.795	-2.45889	0.275833	0.825973	31.39	31.08	31.235	7.98111	-0.271667	1.2072	13.5	13.56	13.53	-9.72389	-2.1825	4.53939	22.59	23	22.795	-0.458889	0.378333	0.769326	31.71	32.09	31.9	8.64611	0.541667	0.686977	28.52	28.6	28.56	5.30611
			23.2539				6.62528						6.02778						-2.73472						8.25278						-7.54139						-0.837222						8.10444						6.23111
[truncated: 2 more columns]

## Sheet: Figure 2b
Figure 2b
Nucleus-enriched lncRNAs
Category	Number of transcripts
Skipped exon	571
Alternative 5' splice sites	436
Alternative 3' splice sites	523
Mutually exclusive exons	42
Retained intron	691
Alternative first exon	763
Alternative last exon	324
Synapse-enriched lncRNAs
Category	Number of transcripts
Skipped exon	1082
Alternative 5' splice sites	377
Alternative 3' splice sites	474
Mutually Exclusive exons	85
Retained intron	262
Alternative first exon	783
Alternative last exon	335

## Sheet: Figure 2c
Figure 2c
transcript_id	ref_gene_name	Nucleus 1	Nucleus 2	Nucleus 3	Nucleus 4	Nucleus 5	Nucleus 6	Synapse 1	Synapse 2	Synapse 3	Synapse 4	average_FPKM_nucleus	average_FPKM_synapse	fold-change	P-value	Q-value
ENSMUST00000065709.11	Gas5	4.00664	4.93488	4.87652	6.2342	2.81701	1.68675	0.384279	0.168231	3.00889	0.171829	4.09267	0.933306	6.607	0.00187842	0.0112859
ENSMUST00000159037.1	Gas5	17.475	13.5379	18.747	9.75769	16.4981	14.6431	0.083716	3.17029	12.6456	4.86576	15.1098	5.19135	10.3913	0.00686361	0.0332055
ENSMUST00000159119.7	Gas5	0.728166	0.353559	0.613229	0.326664	0.374897	0.808205	0	39.2729	12.9952	54.3817	0.53412	26.6624	0.171566	0.220864	0.406713
ENSMUST00000159153.7	Gas5	1.4836	2.14084	2.4235	1.39311	1.8749	1.82604	0.174597	0.86315	1.41028	0.740377	1.857	0.797102	2.1749	0.00776294	0.0367273
ENSMUST00000159157.7	Gas5	3.76799	4.00998	5.98949	5.12263	2.798	2.12031	0.243253	0.130568	0.297003	0.229948	3.96807	0.225193	3.84818	0.00197588	0.0117729
ENSMUST00000159399.7	Gas5	4.25058	6.27671	4.36357	4.01182	8.53796	8.5353	0.699874	1.58752	8.10018	0.18234	5.99599	2.64248	9.29335	0.000495018	0.00370284
ENSMUST00000159404.7	Gas5	0.633915	0.337902	1.06142	0.248221	0.474722	0.800218	3.90094	5.4161	18.892	15.457	0.592733	10.9165	0.251497	0.0237604	0.0880409
ENSMUST00000159438.7	Gas5	1.82445	2.78871	3.01222	1.90765	2.3555	4.49622	0.819624	0.659208	0	0.104386	2.73079	0.395805	1.96048	0.0455832	0.129846
ENSMUST00000159663.7	Gas5	0.181483	0.049686	0.011582	0.048223	0.135176	0.075546	0	1.23343	0	3.7238	0.083616	1.23931	0.364839	0.0787954	0.201363
ENSMUST00000159706.7	Gas5	4.53313	3.64941	7.25408	2.01788	4.96097	11.7567	666.672	556.56	123.179	844.407	5.69536	547.705	0.00321351	1.71455e-06	5.11453e-05
ENSMUST00000159890.7	Gas5	0.898888	1.11505	0.898681	0.713913	0.772435	1.24877	0.976236	7.79375	14.022	3.09455	0.941289	6.47163	1.01773	0.965957	0.973806
ENSMUST00000160429.7	Gas5	7.95187	9.71051	9.60785	11.3762	6.97286	2.16937	1.85617	18.2148	107.838	1.80848	7.96479	32.4294	8.50183	0.0204035	0.0788016
ENSMUST00000160497.1	Gas5	3.76831	3.37474	8.23761	6.59534	4.9877	14.5277	0.663731	0.217072	0.12695	0.201721	6.91523	0.302369	4.62192	0.0113197	0.0497843
ENSMUST00000160516.1	Gas5	3.63325	1.76428	2.65357	0.76515	0.2065	3.28824	0.023607	0.030003	0.811439	0	2.05183	0.216262	2.79064	0.0963015	0.235774
ENSMUST00000160551.1	Gas5	5.50852	3.66756	6.83242	3.42746	7.85049	3.5281	0.126805	0.091801	0.427025	0.083519	5.13576	0.182287	5.32528	0.000807746	0.00554736
ENSMUST00000161005.7	Gas5	0	0	0.365196	0	0	0.26751	1.62145	3.37696	0	0	0.105451	1.2496	0.370957	0.0889571	0.221561
ENSMUST00000161229.7	Gas5	104.463	100.727	110.188	98.33	119.672	102.604	11.9845	8.71863	0.385769	13.0764	105.997	8.54132	3.10081	0.00647205	0.0316636
ENSMUST00000161380.7	Gas5	0.409767	0.253592	0.568107	0.160615	0.527417	0.73033	0.577819	1.27895	14.7253	0.497703	0.441638	4.26995	2.1921	0.0867511	0.217135
ENSMUST00000161461.7	Gas5	4.96471	5.90163	7.26978	4.08789	3.89604	4.13993	10.5538	6.09205	73.1793	1.64012	5.04333	22.8663	2.71487	0.192838	0.367779
ENSMUST00000161623.7	Gas5	3.58332	2.47228	4.62469	2.58874	2.89429	4.49807	0.091967	4.76646	8.70136	1.43145	3.44356	3.74781	3.7288	0.0377284	0.111442
ENSMUST00000162163.7	Gas5	10.516	10.1219	12.3024	10.954	9.59694	10.7806	2.13188	8.54023	4.09277	0.31257	10.712	3.76936	5.22458	0.0213023	0.0812753
ENSMUST00000162289.7	Gas5	34.8354	31.2258	39.1339	28.5308	38.747	31.6548	5.00653	13.1323	0	6.35211	34.0213	6.12274	1.696	0.329038	0.542886
ENSMUST00000162558.7	Gas5	4.01819	3.53764	4.59096	3.1625	4.80316	4.56548	330.972	662.34	4099.84	863.993	4.11299	1489.29	0.0212786	5.5321e-05	0.000627536
ENSMUST00000163081.1	Gas5	2.47503	2.45952	4.04481	1.47902	2.95749	2.17007	0.328244	0.110415	0.01775	0.109624	2.59766	0.141508	2.34411	0.00335104	0.0183784

## Sheet: Figure 2d
Figure 2d
	PGK			E11-I11-E12						I9-E10						I8-E11						E2-I2						I5						E1-E2-E3							E8-E12
	CT1	CT2	Average CT	CT1	CT2	Average CT	∆CT	∆∆CT	Fold change	CT1	CT2	Average CT	∆CT	∆∆CT	Fold change	CT1	CT2	Average CT	∆CT	∆∆CT	Fold change	CT1	CT2	Average CT	∆CT	∆∆CT	Fold change	CT1	CT2	Average CT	∆CT	∆∆CT	Fold change	CT1	CT2	Average CT	∆CT	∆∆CT	Fold change	CT1	CT2	Average CT	∆CT	∆∆CT	Fold change
Nucleus 1	23.09	22.98	23.035	23.14	23.41	23.275	0.221667	0.1275	0.915416	24.9	24.94	24.92	1.86667	0.150833	0.90073	23.92	23.93	23.925	0.871667	0.131667	0.912776	23.97	23.93	23.95	0.896667	0.359167	0.779615	25.5	25.42	25.46	2.40667	0.355833	0.781418	20.59	20.58	20.585	-2.46833	-0.05125	1.03616	24.16	23.93	24.045	0.991667	0.234167	0.850176
Nucleus 2	22.98	23.09	23.035	23.78	23.8	23.79	0.736667	0.6425	0.640602	25.48	25.44	25.46	2.40667	0.690833	0.619496	24.44	24.51	24.475	1.42167	0.681667	0.623445	24.07	24.14	24.105	1.05167	0.514167	0.700197	25.62	25.71	25.665	2.61167	0.560833	0.67791	20.59	20.68	20.635	-2.41833	-0.00125	1.00087	23.99	24.24	24.115	1.06167	0.304167	0.80991
Nucleus 3	23.27	23.25	23.26	23.33	23.22	23.275	0.221667	0.1275	0.915416	24.8	24.8	24.8	1.74667	0.0308333	0.978855	23.76	23.82	23.79	0.736667	-0.00333333	1.00231	23.6	23.62	23.61	0.556667	0.0191667	0.986803	25.13	25.12	25.125	2.07167	0.0208333	0.985663	20.97	20.96	20.965	-2.08833	0.32875	0.796226	23.23	24.6	23.915	0.861667	0.104167	0.930342
Nucleus 4	22.81	22.73	22.77	23.32	22.77	23.045	-0.00833333	-0.1025	1.07363																									20.58	20.52	20.55	-2.50333	-0.08625	1.06161	23.7	23.53	23.615	0.561667	-0.195833	1.14539
Nucleus 5	23.28	22.65	22.965	23.56	23.66	23.61	0.556667	0.4625	0.725728																									20.51	20.59	20.55	-2.50333	-0.08625	1.06161	23.4	23.27	23.335	0.281667	-0.475833	1.39072
Nucleus 6	22.96	22.98	22.97	23.11	23.12	23.115	0.0616667	-0.0325	1.02278																									20.69	20.74	20.715	-2.33833	0.07875	0.946878	23.5	23.57	23.535	0.481667	-0.275833	1.21069
Nucleus 7	22.88	22.98	22.93	22.7	22.85	22.775	-0.278333	-0.3725	1.29459	24.09	24.13	24.11	1.05667	-0.659167	1.57917	23.27	23.16	23.215	0.161667	-0.578333	1.49312	22.94	22.99	22.965	-0.0883333	-0.625833	1.5431	24.47	24.53	24.5	1.44667	-0.604167	1.5201	20.8	20.81	20.805	-2.24833	0.16875	0.889613	23.71	24.57	24.14	1.08667	0.329167	0.795996
Nucleus 8	23.15	23.24	23.195	23.12	23.08	23.1	0.0466667	-0.0475	1.03347	24.76	24.86	24.81	1.75667	0.0408333	0.972093	23.87	23.9	23.885	0.831667	0.0916667	0.938438	23.63	23.58	23.605	0.551667	0.0141667	0.990228	25.1	25.08	25.09	2.03667	-0.0141667	1.00987	20.58	20.54	20.56	-2.49333	-0.07625	1.05427	24.62	24.42	24.52	1.46667	0.709167	0.611673
Nucleus 9	23.47	23.56	23.515	22.84	23.09	22.965	-0.0883333	-0.1825	1.13485	24.47	24.56	24.515	1.46167	-0.254167	1.19265	23.51	23.43	23.47	0.416667	-0.323333	1.25122	23.29	23.33	23.31	0.256667	-0.280833	1.2149	24.8	24.77	24.785	1.73167	-0.319167	1.24761	20.51	20.53	20.52	-2.53333	-0.11625	1.08391	24.19	24.42	24.305	1.25167	0.494167	0.709972
Nucleus 10	22.61	22.66	22.635	22.71	22.69	22.7	-0.353333	-0.4475	1.36368																									20.64	20.7	20.67	-2.38333	0.03375	0.976878	23.61	23.54	23.575	0.521667	-0.235833	1.17759
Nucleus 11	23.11	23.01	23.06	23.21	23.06	23.135	0.0816667	-0.0125	1.0087																									20.55	20.58	20.565	-2.48833	-0.07125	1.05063	23.39	23.38	23.385	0.331667	-0.425833	1.34335
Nucleus 12	23.25	23.29	23.27	23	22.97	22.985	-0.0683333	-0.1625	1.11922																									20.43	20.6	20.515	-2.53833	-0.12125	1.08768	23.21	23.28	23.245	0.191667	-0.565833	1.48024
Synapse 1	28.67	28.79	28.73	37.09	35.11	36.1	8.35	8.25583	0.0032715	35.58		35.58	7.83	6.11417	0.0144362		43.36	43.36	15.61	14.87	3.33952e-05	35.71	35.42	35.565	7.815	7.2775	0.00644546	32.8	35.95	34.375	6.625	4.57417	0.0419796	25.04	25.27	25.155	-2.595	-0.177917	1.13125	28.77	28.89	28.83	1.08	0.3225	0.799683
Synapse 2	28	28.07	28.035	35.61	34.36	34.985	7.235	7.14083	0.0070859																									23.97	23.94	23.955	-3.795	-1.37792	2.59893	27.55	27.66	27.605	-0.145	-0.9025	1.8693
Synapse 3	27.21	27.25	27.23		35.19	35.19	7.44	7.34583	0.00614729																									23.14	23.18	23.16	-4.59	-2.17292	4.50934	26.68	26.5	26.59	-1.16	-1.9175	3.77768
Synapse 4	31.88	32.12	32	40.45	34.74	37.595	9.845	9.75083	0.00116066																									27.74	27.96	27.85	0.1	2.51708	0.174696	32.5	32.54	32.52	4.77	4.0125	0.0619608
Synapse 5	26.71	26.58	26.645	33.21	34.47	33.84	6.09	5.99583	0.0156702	33.85	35.53	34.69	6.94	5.22417	0.0267528	39.83	44.68	42.255	14.505	13.765	7.18327e-05	34.79	33.8	34.295	6.545	6.0075	0.015544	34.48	34.4	34.44	6.69	4.63917	0.0401302	22.44	22.51	22.475	-5.275	-2.85792	7.24968	25.84	25.84	25.84	-1.91	-2.6675	6.35327
Synapse 6	27.09	26.16	26.625	33.9	33.17	33.535	5.785	5.69083	0.0193592	33.85	33.94	33.895	6.145	4.42917	0.0464182	40.11	37.46	38.785	11.035	10.295	0.000795969	34.63	33.75	34.19	6.44	5.9025	0.0167175	34.32	34.43	34.375	6.625	4.57417	0.0419796	21.81	21.85	21.83	-5.92	-3.50292	11.3366	24.95	24.98	24.965	-2.785	-3.5425	11.652
Synapse 7	26.62	26.72	26.67	34.25	33.92	34.085	6.335	6.24083	0.0132228		35.39	35.39	7.64	5.92417	0.0164683	40.91		40.91	13.16	12.42	0.000182477	34.36	35.76	35.06	7.31	6.7725	0.00914691	35.8	35.39	35.595	7.845	5.79417	0.0180211	22.67	22.81	22.74	-5.01	-2.59292	6.03317	26.11	26.11	26.11	-1.64	-2.3975	5.26889
Synapse 8	27.02	26.98	27	34.8	36.98	35.89	8.14	8.04583	0.0037841																									22.33	22.42	22.375	-5.375	-2.95792	7.77001	25.71	26.07	25.89	-1.86	-2.6175	6.13686
Synapse 9	26.94	27	26.97	35.19	34.87	35.03	7.28	7.18583	0.00686829																									22.32	22.36	22.34	-5.41	-2.99292	7.96082	25.22	25.26	25.24	-2.51	-3.2675	9.62976
Synapse 10	27.54	27.65	27.595	34.74	34.41	34.575	6.825	6.73083	0.00941493																									23.13	23.09	23.11	-4.64	-2.22292	4.66836	26.48	26.57	26.525	-1.225	-1.9825	3.95177
			23.0533				0.0941667						1.71583						0.74						0.5375						2.05083						-2.41708						0.7575
			27.75

## Sheet: Figure 2e
Figure 2e
		18S		Meg3						Gas5
	CT1	CT2	Average CT	CT1	CT2	Average CT	∆CT	∆∆CT	Fold change	CT1	CT2	Average CT	∆CT	∆∆CT	Fold change
Nucleus 1	16.51	16.69	16.6							22.32	22.22	22.27	5.48875	-0.0966667	1.0693
Nucleus 2	16.59	16.7	16.645	20.97	20.83	20.9	3.68025	-0.57	1.48452	22.28	22.33	22.305	5.52375	-0.0616667	1.04367
Nucleus 3	17.22	17.28	17.25	21.84	21.9	21.87	4.65025	0.4	0.757858	22.36	22.69	22.525	5.74375	0.158333	0.89606
Nucleus 4	16.85	17.04	16.945	21.77	21.89	21.83	4.61025	0.36	0.779165
Nucleus 5	16.33	17.04	16.685	21.6	21.64	21.62	4.40025	0.15	0.90125
Nucleus 6	15.64	15.85	15.745							22.57	22.43	22.5	5.71875	0.133333	0.911722
Nucleus 7	17.75	17.44	17.595	21.86	21.81	21.835	4.61525	0.365	0.776469	22.46	22.49	22.475	5.69375	0.108333	0.927659
Nucleus 8	17.21	17.24	17.225	20.91	20.92	20.915	3.69525	-0.555	1.46917	22.14	22.04	22.09	5.30875	-0.276667	1.21139
Nucleus 9	15.79	15.78	15.785	21.34	21.25	21.295	4.07525	-0.175	1.12896
Nucleus 10	17.99	17.34	17.665	21.38	21.61	21.495	4.27525	0.025	0.982821
Synapse 1	15.97	17.11	16.54							26.88	27.06	26.97	9.3445	-0.22375	1.16777
Synapse 2	18.57	18.58	18.575	33.71	33.87	33.79	16.5702	12.32	0.000195574	26.26	26.16	26.21	8.5845	-0.98375	1.9776
Synapse 3	16.86	17.09	16.975	33.33	33.76	33.545	16.3253	12.075	0.000231773	25.41	25.48	25.445	7.8195	-1.74875	3.36067
Synapse 4	20.61	21.35	20.98	36.96	36.88	36.92	19.7003	15.45	2.23402e-05	29.96	30.34	30.15	12.5245	2.95625	0.128849
Synapse 5	16.22	16.35	16.285							24.69	24.69	24.69	7.0645	-2.50375	5.67158
Synapse 6	15.96	16.5	16.23							24	24.17	24.085	6.4595	-3.10875	8.62635
Synapse 7	16.17	15.92	16.045							24.69	24.56	24.625	6.9995	-2.56875	5.93295
Synapse 8	17.87	17.96	17.915	32.88	33.75	33.315	16.0952	11.845	0.000271831	24.71	25.04	24.875	7.2495	-2.31875	4.989
Synapse 9	17.53	18.06	17.795	33.58	33.2	33.39	16.1702	11.92	0.000258061	24.69	25.04	24.865	7.2395	-2.32875	5.0237
Synapse 10	18.83	19	18.915	33.57	33.86	33.715	16.4953	12.245	0.00020601
			17.2198				4.25025						5.57958

## Sheet: Figure 2f
Figure 2f	Gas5 Basescope

## Sheet: Figure 4b
Figure 4b	Anti-CAPRIN1 and G3BP2
	D1-D5						D6-D10

## Sheet: Figure 4c
Figure 4c
Caprin1	Rep1		Rep2		Rep3
	Intensity	Ratio	Intensity	Ratio	Intensity	Ratio
Gas5Del1	13530.9	1.20673	13553.2	1.20872	8646.88	0.771155
Gas5Del2	11272.4	1.0053	12889.7	1.14955	13708.1	1.22253
Gas5Del3	14361.9	1.28083	12684.2	1.13122	14784.4	1.31851
Gas5Del4	13238.8	1.18067	7021.79	0.626224	9755.97	0.870067
Gas5Del5	8206.16	0.73185	9090.02	0.810675	12642.8	1.12753
Gas5Del6	14087.6	1.25637	15593.5	1.39068	7656.98	0.682872
Gas5Del7	21671.7	1.93274	21250.8	1.89521	10440.9	0.931148
Gas5Del8	12161.3	1.08458	13276.8	1.18406	9191.67	0.81974
Gas5Del9	9019.04	0.804345	991.803	0.0884519	4438.76	0.395862
Gas5Del10	7246.18	0.646236	603.882	0.053856	5635.01	0.502547
Adram	4311.17	0.478008	6037.45	0.669412	2081.19	0.230755
Neat1	5226.24	0.579467	3883.26	0.430563	1343.58	0.148971
FL	11212.9

[truncated: 40 more sheets: Figure 4d, Figure 5b, Figure 5c, Figure 5d, Figure 5e, Figure 5f, Figure 5h, Figure 5i, Figure 5j, Figure 5k, Figure 5m, Figure 5n, Figure 6a, Figure 6b, Figure 6d , Figure 6e, Supplementary Figure 1a, Supplementary Figure 1b, Supplementary Figure 1c, Supplementary Figure 2a …]
